# Supplementary material for: Expression of XBP1s in peritoneal mesothelial cells is critical for inflammation-induced peritoneal fibrosis
Source: PubMed Central journal article supplement (PMC6911080; doi:10.1038/s41598-019-55557-1), 2019-12-13
Supplement: 41598_2019_55557_MOESM1_ESM.pdf [file 41598_2019_55557_MOESM1_ESM.pdf]

**Expression of XBP1s in peritoneal mesothelial cells is critical for  
inflammation-induced peritoneal fibrosis**

An Liu<sup>a,1</sup>, Qiong Song<sup>b,1</sup>, Yong Zheng<sup>c,1</sup>, Guoshuang Xu<sup>c\*</sup>, Chen Huang<sup>c</sup>, Shiren Sun<sup>c</sup>,  
Lijie He<sup>c</sup>, Lijuan Zhao<sup>c</sup>, Meilan Zhou<sup>c</sup>

<sup>a</sup>Outpatient Department, Xi'an Children's Hospital, Xi'an 710043 China

<sup>b</sup>Department of Nephrology, Shaanxi Second People's Hospital, Xi'an 710005 China

<sup>c</sup>Department of Nephrology, Xijing Hospital, The Fourth Military Medical University  
of People's Liberation Army, Xi'an 710032 China

<sup>1</sup> These authors contributed equally to this work.

\*Correspondence to:

Dr. Guoshuang Xu, Department of Nephrology, Xijing Hospital, The Fourth Military  
Medical University of People's Liberation Army, No.127, Changle West Road, Xi'an 710032,  
China. E-mail: [xugsh882003@aliyun.com](mailto:xugsh882003@aliyun.com) Telephone number: 86-18602916264

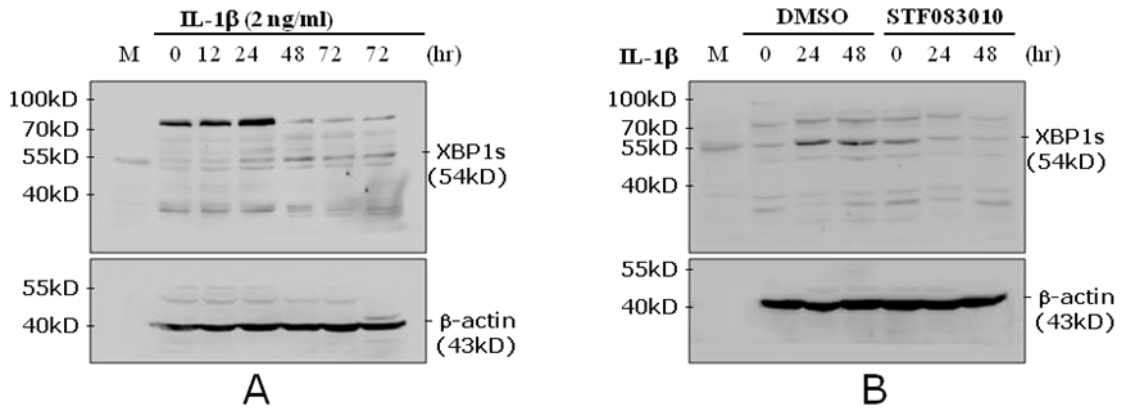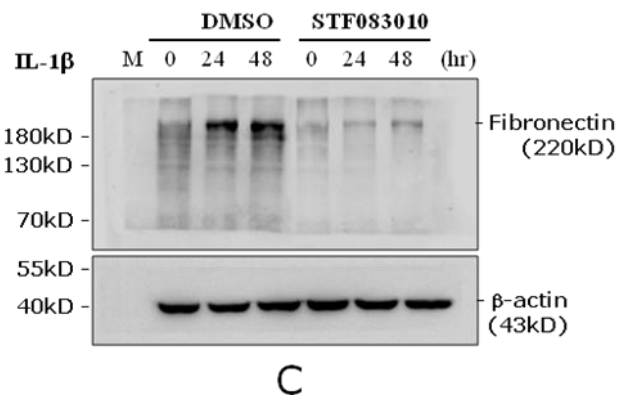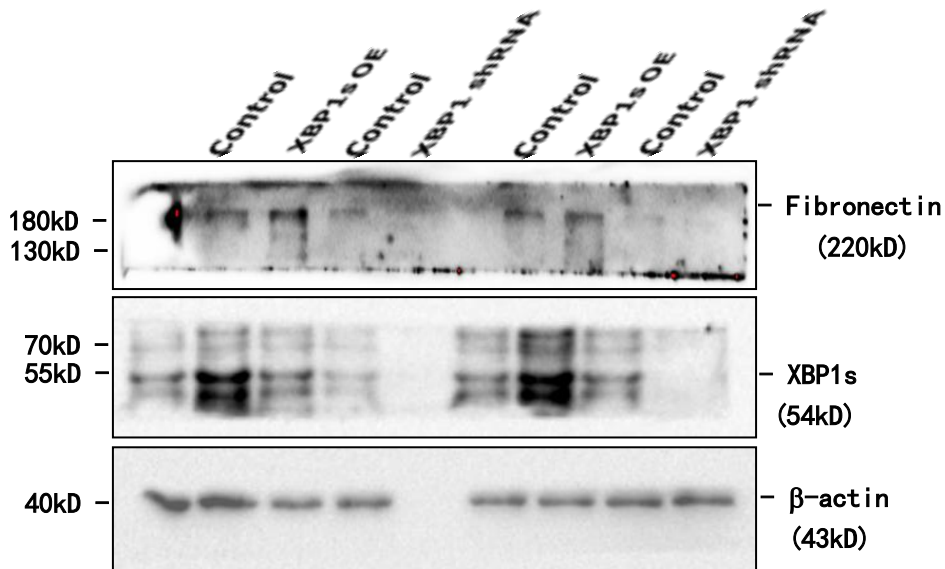

**Supplementary Figure 1. IL-1 $\beta$  induced XBP1s and fibronectin expression (the full-length blots for Figure 1C, Figure 2A, 2C and 2D).**

(A) The full-length blot for Figure 1C. The XBP1s was detected from the

full-length blot, while the  $\beta$ -actin detection was from a different part of the same blot (after detection of XBP1s, the blot was cropped between 70 kD and 55 kD, and  $\beta$ -actin was detected from the lower blot). (B) The full-length blots for Figure 2A. The XBP1s was detected from the full-length blot, while the  $\beta$ -actin detection was from a different part of the same blot (after detection of XBP1s, the blot was cropped between 70 kD and 55 kD, and  $\beta$ -actin was detected from the lower blot). (C) The full-length blot for Figure 2C. The fibronectin and  $\beta$ -actin were detected from different parts of the same blot (the blot was cropped between 70 kD and 55 kD, then fibronectin was detected from the upper blot and  $\beta$ -actin was detected from the lower blot). (D) The full-length blot for Figure 2D. The fibronectin, XBP1s and  $\beta$ -actin were detected from different parts of the same blot (the blot was cropped into 3 pieces between 130 kD and 70 kD, 55 kD and 40 kD, then fibronectin was detected from the upper blot, XBP1s was detected from the middle blot and  $\beta$ -actin was detected from the lower blot). M, protein marker. OE, overexpression. CG, chlorhexidine digluconate.

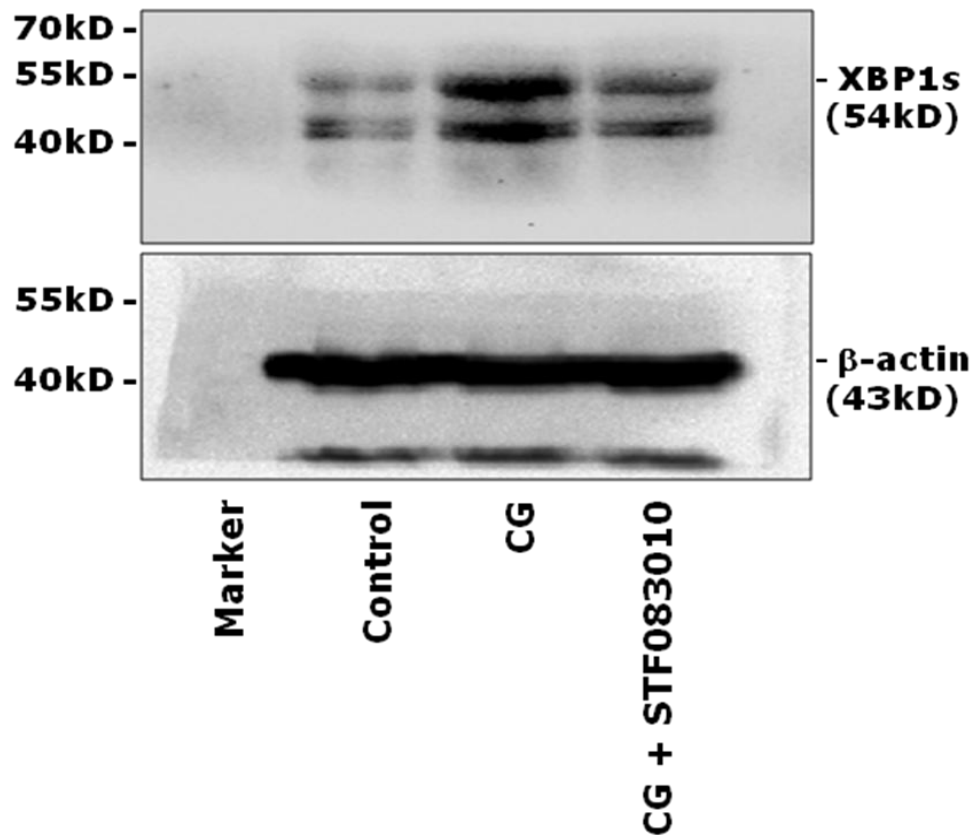

**Supplementary Figure 2. CG induced XBP1s expression in rat peritoneal tissue (the full-length blots for Figure 3A). The XBP1s was detected from the full-length blot, while the  $\beta$ -actin detection was from a different part of the same blot (after detection of XBP1s, the blot was cropped between 70 kD and 55 kD, and  $\beta$ -actin was detected from the lower blot). CG, chlorhexidine digluconate.**
